# Supplementary material for: The transport properties of silicon and carbon nanotubes at the atomic scale: a first-principles study
Source: Royal Society of Chemistry journal article supplement (doi:10.1039/c6cp03393h), 2016-01-01
Supplement: c6cp03393h1.pdf [file c6cp03393h1.pdf]

## Electronic supplementary information

# The transport properties of silicon and carbon nanotubes at the atomic scale: A first-principles study

Tengying Ma<sup>b,d</sup>, Shizheng Wen<sup>c</sup>, Likai Yan<sup>d</sup>, Caixia Wu<sup>d</sup>, ChunMei Zhang<sup>\*a</sup>, Min Zhang<sup>\*d</sup> and Zhongmin Su<sup>\*b,d</sup>

<sup>a</sup> *Department of Cell Biology, College of Basic Medical Sciences, Jilin University, Changchun, Jilin, 130021, P.R. China*

<sup>b</sup> *College of Chemistry, Jilin University, Changchun 130012, P. R. China.*

<sup>c</sup> *Jiangsu Province Key Laboratory for Chemistry of Low-Dimensional Materials, School of Chemistry and Chemical Engineering, Huaiyin Normal University, Huaian, 223300, People's Republic of China*

<sup>d</sup> *Institute of Functional Material Chemistry, Faculty of Chemistry, Northeast Normal University, Changchun 130024, P. R. China.*

E-mail: [zhangcm499@jlu.edu.cn](mailto:zhangcm499@jlu.edu.cn); [mzhang@nenu.edu.cn](mailto:mzhang@nenu.edu.cn); [zmsu@nenu.edu.cn](mailto:zmsu@nenu.edu.cn)

### Content

1. The theoretical model with different buffer layers for armchair (3, 3) SiNTs.
2. Current-voltage,  $I-V_b$ , characteristic for **Model 1** and **Model 2**.
3. The relative energies of all systems in different Monkhorst-Pack grids and grid mesh cutoff.

1. The theoretical model with different Au atomic buffer layers, armchair (3, 3) SiNT is taken as an example. **Model 1** includes two and one atomic layers of Au atoms for the left and right of the molecule, and **Model 2** includes four and three atomic layers of Au atoms for the left and right of the molecule.

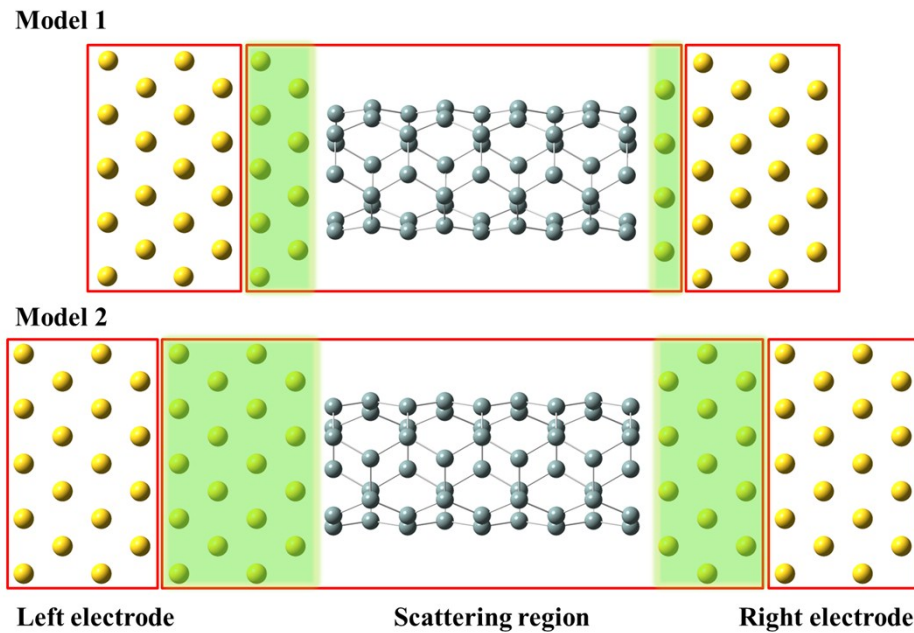

**Fig. S1** The theoretical model with different buffer layers for armchair (3, 3) SiNTs.

2. The corresponding Current-voltage characteristic **Model 1** and **Model 2**, respectively.

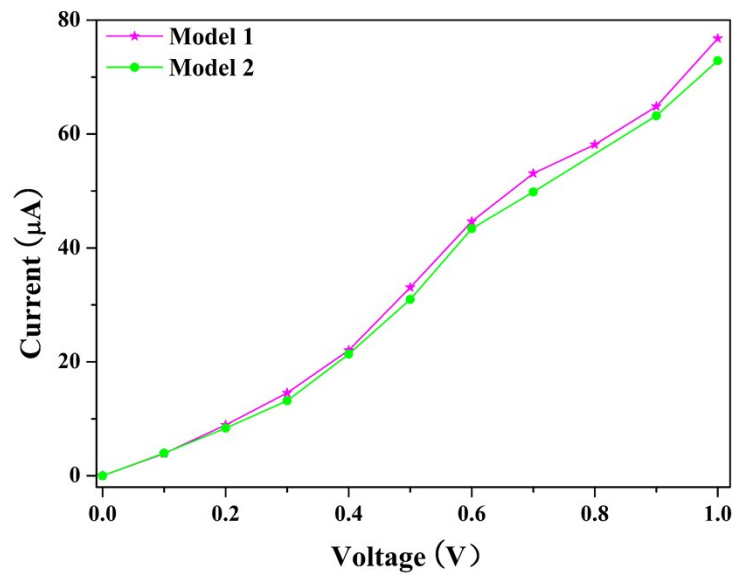

**Fig. S2** Current-voltage,  $I-V_b$ , characteristic for **Model 1** and **Model 2**.

3. The Brillouin-zone sampling and the energy cutoff of the calculations are simulated at different values.

**Table S1** The relative energies of all systems in different Monkorts-Pack grids and grid mesh cutoff.

| Monkhorts-Pack grids | 1×1×20 |          |           | 1×1×40   | 1×1×60   |
|----------------------|--------|----------|-----------|----------|----------|
| grid mesh cutoff     | 250 Ry | 300 Ry   | 350 Ry    | 250 Ry   | 250 Ry   |
| Si (3,3)             | 0      | -1.4E-02 | 2.5E-03   | 1.5E-05  | 1.4E-05  |
| Si (5, 0)            | 0      | 3.2 E-04 | 6.6 E-04  | 1E-06    | 1E-06    |
| Si (6, 0)            | 0      | -2.2E-03 | 8.2 E-04  | -3E-05   | -6.6E-05 |
| Si (7, 0)            | 0      | 5.4E-04  | 1.2 E-03  | -5E-05   | -5.2E-05 |
| C (3,3)              | 0      | -3.1E-02 | -3.3 E-02 | -2.8E-03 | -4.7E-03 |
| C (5, 0)             | 0      | -1.3E-02 | -1.9 E-02 | -9.6E-05 | -9.3E-05 |
| C (6, 0)             | 0      | -2.2E-02 | -2.9 E-02 | 2.5E-05  | 3.2E-05  |
| C (7, 0)             | 0      | -2.0E-02 | -2.7 E-02 | -1.3E-04 | -1.0E-04 |
